# Supplementary material
Source: publisher figshare collection journal article supplement (https://acs.figshare.com/ndownloader/files/3986611)
Supplement: Supplementary file 1 [file 3986611]

## Supporting Information

### Wetting States on Circular Micropillars with Convex Sidewalls after Liquids

#### Contact Groove Base

\*Cheng Luo and Mingming Xiang

Department of Mechanical and Aerospace Engineering, University of Texas at Arlington

500 W. First Street, Woolf Hall 226, Arlington, TX 76019, USA; \*email:

[chengluo@uta.edu](mailto:chengluo@uta.edu)

Equation (4) can be further re-written as

$$\frac{d[(w-x)\sin\theta]}{dx} = 2b(w-x), \quad (\text{s1})$$

where  $\frac{dx}{ds} = \cos\theta$  was used in deriving this equation from Eq. (4). With the aid of Eq.

2(b), it follows from Eq. (s1) that

$$\sin\theta = \frac{c}{(w-x)} - b(w-x), \quad (\text{s2})$$

where  $c$  is a constant and has the following expression:

$$c = r \sin\theta_2 + br^2. \quad (\text{s3})$$

Given that  $\theta = \theta_1$  at  $a_1$ , it follows from Eqs. (s2) and (s3) that

$$b = \frac{r \sin\theta_2 - w \sin\theta_1}{w^2 - r^2}. \quad (\text{s4})$$

Noting that

$$\frac{dy}{dx} = \tan\theta, \quad (\text{s5})$$

with the assistance of Eq. (s2), we have

$$\frac{dy}{dx} = \frac{c - b(w-x)^2}{\sqrt{(1 + \frac{bc}{2})(w-x)^2 - [b^2(w-x)^4 + c^2]}}. \quad (s6)$$

Let  $x_p$  and  $y_p$  represent  $x$  and  $y$  coordinates of a representative point  $p$  on  $a_1b_1$ , where  $x_p$  ranges from 0 to  $(w-r)$ . In view of Eq. (s6),  $y_p$  is given below:

$$y_p(x_p) = \int_0^{x_p} \frac{c - b(w-x)^2}{\sqrt{(1 + \frac{bc}{2})(w-x)^2 - [b^2(w-x)^4 + c^2]}} dx. \quad (s7)$$

This equation gives a solution to Eqs. (4) and (2). When  $x_p = w-r$ , we have

$$y_{b_1} = \int_0^{w-r} \frac{c - b(w-x)^2}{\sqrt{(1 + \frac{bc}{2})(w-x)^2 - [b^2(w-x)^4 + c^2]}} dx, \quad (s8)$$

where  $(w-r)$  and  $y_{b_1}$ , respectively, represent  $x$  and  $y$  coordinates of  $b_1$ . In the case of circular micropillars with concave sidewalls, it is observed from Eq. (2b) that  $\theta_2$  is a function of  $\varphi$ . For a given sidewall profile,  $\varphi$  can also be determined from  $r$ . In this sense,  $\varphi$  is also a function of  $r$ . Therefore, by Eq. (s4),  $b$  is actually a function of  $w$  and  $r$  for given microstructures. Since Eq. (s8) gives another relation that  $b$ ,  $w$  and  $r$  have to meet,  $b$  and  $w$  both can be considered to be functions of  $r$  only. Thus, once  $\theta_{01}$ ,  $\theta_{02}$ ,  $r$ , and the equation of the sidewall profile are given, the solution to Eqs. (s4) and (s8) give unique values to  $b$  and  $w$ . Subsequently, a unique value of  $y_p$  can be obtained from Eq. (s7). Consequently, Eq. (s7) is also a unique solution to Eqs. (4) and (2). On the other hand, since the right-hand side of Eq. (s7) is an elliptical integral, we cannot get a straightforward expression of  $y_p$ . However, once  $\theta_{01}$ ,  $\theta_{02}$ ,  $r$ , and the equation of the

sidewall profile are given, a numerical value can be found for  $y_p$  by numerically integrating this elliptical integral.
